# Supplementary material for: Characterization of the Phosphorylation Site of GRTH/DDX25 and Protein Kinase A Binding Interface Provides Structural Basis for the Design of a Non-Hormonal Male Contraceptive
Source: PubMed Central journal article supplement (PMC6491591; doi:10.1038/s41598-019-42857-9), 2019-04-30

**Characterization of the Phosphorylation Site of GRTH/DDX25 and Protein Kinase A Binding Interface  
Provides Structural Basis for the Design of a Non-Hormonal Male Contraceptive**

Murugananthkumar Raju<sup>1,a</sup>, Sergio A. Hassan<sup>2,a</sup>, Raghuveer Kavarthapu<sup>1</sup>, Rajakumar Anbazhagan<sup>1</sup> and Maria L. Dufau<sup>1\*</sup>

<sup>1</sup> Section on Molecular Endocrinology, Division of Developmental Biology, Eunice Kennedy Shriver National Institute of Child Health and Human Development; <sup>2</sup> Center for Molecular Modeling, OIR/CIT, National Institutes of Health, Bethesda, MD 20892-4510

Fig. S1

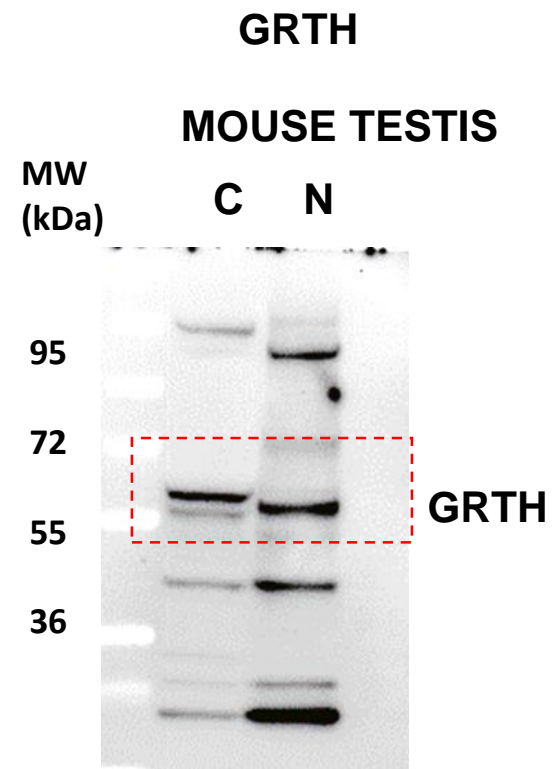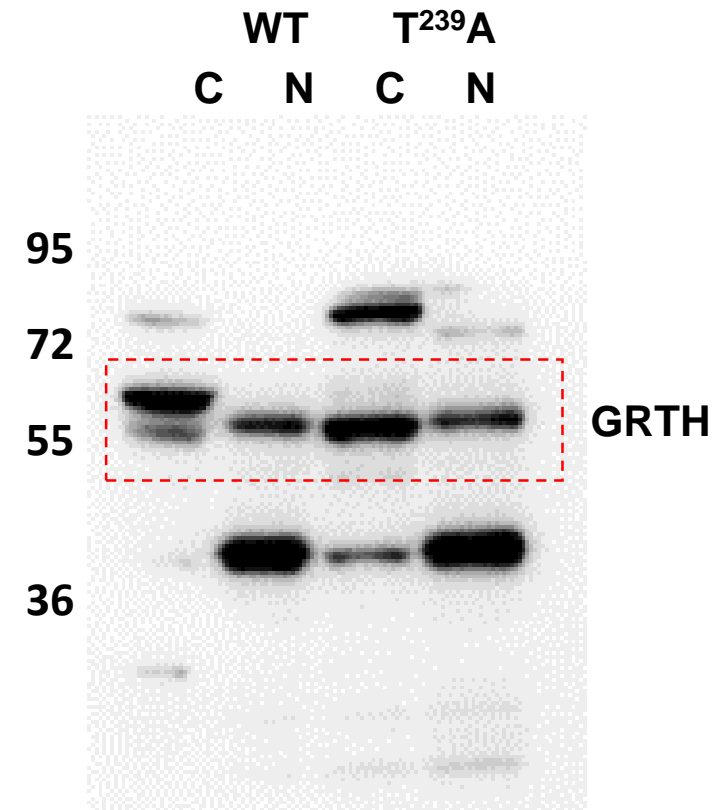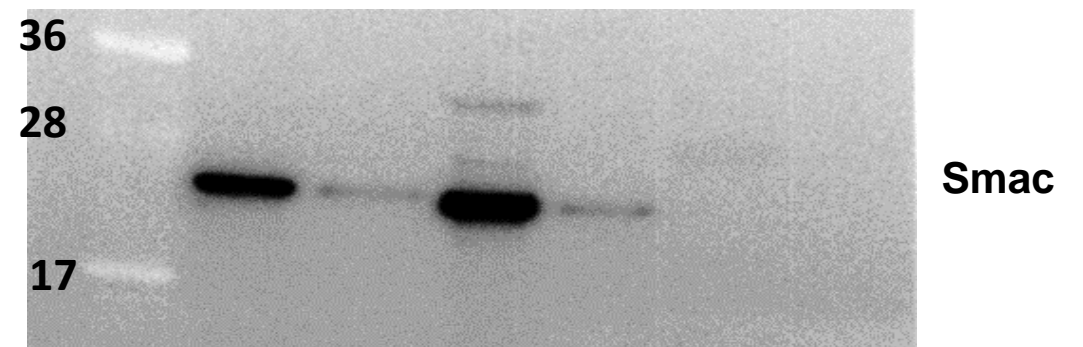

HDAC1

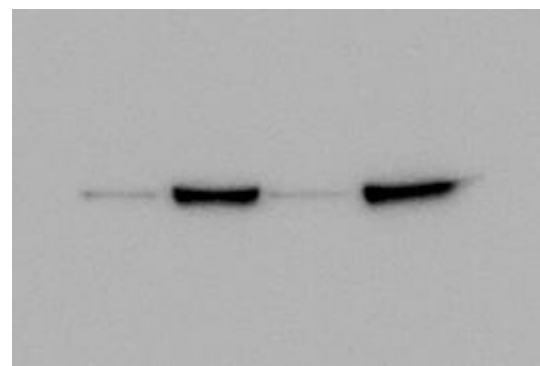

$\beta$ -actin

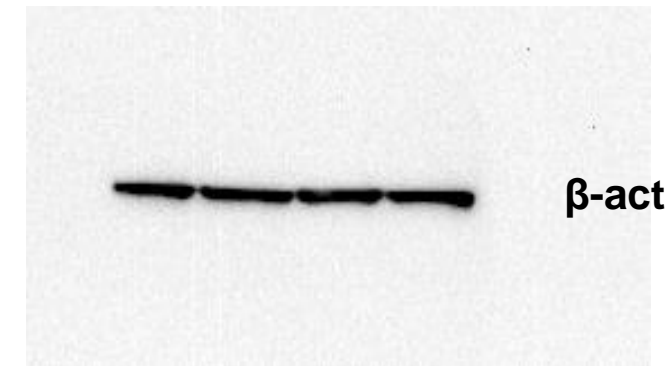

Fig. S2

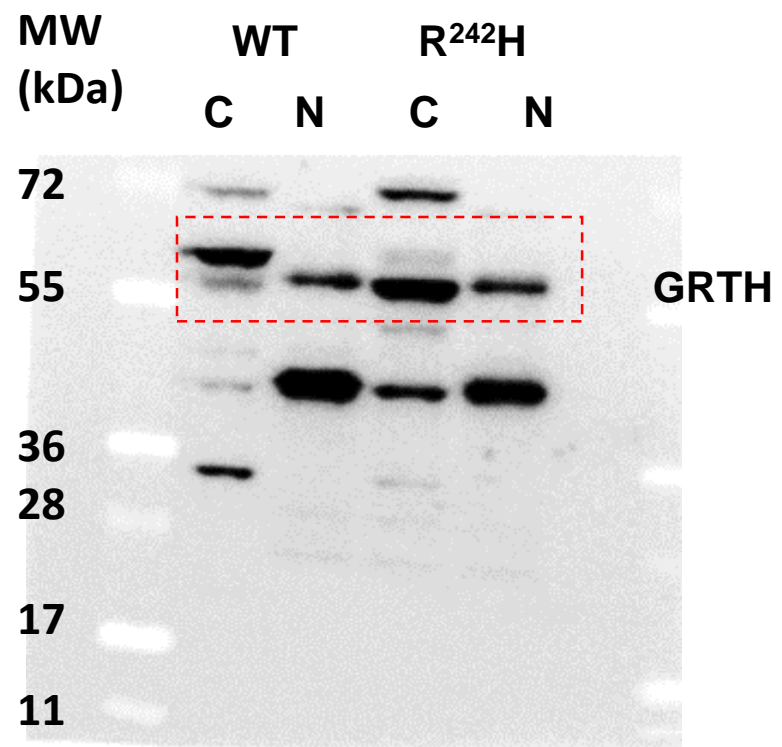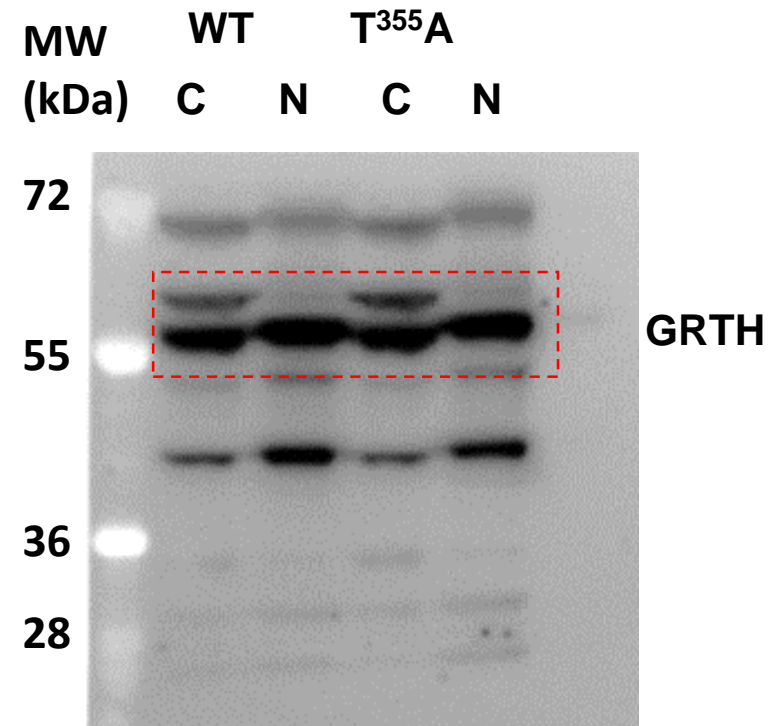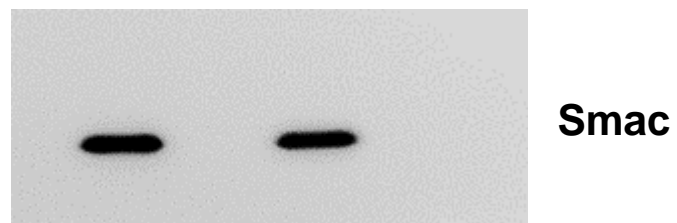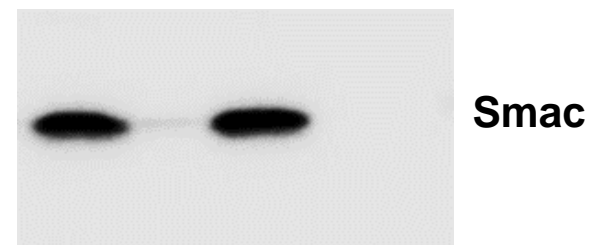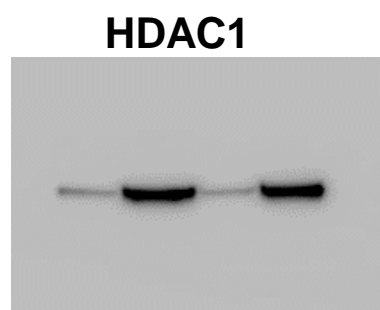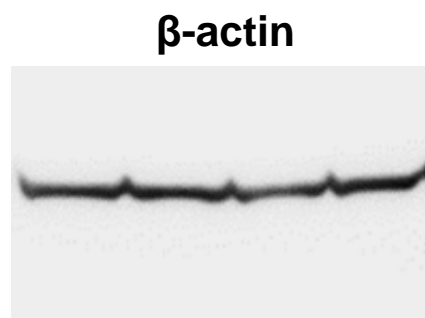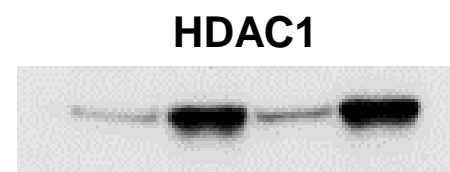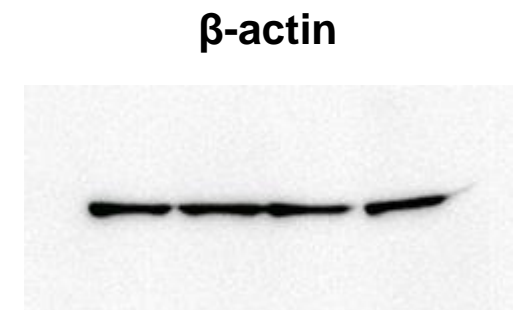

Fig. S3

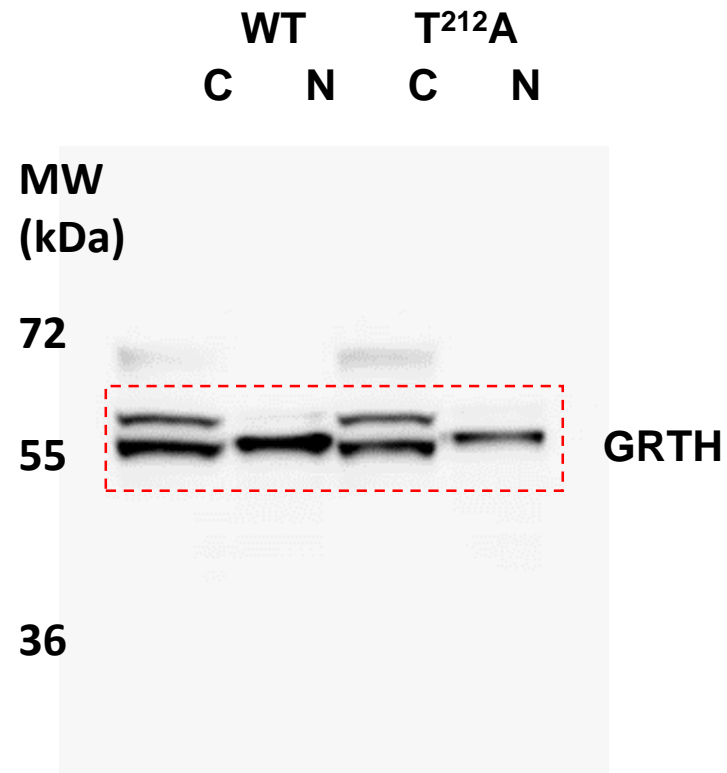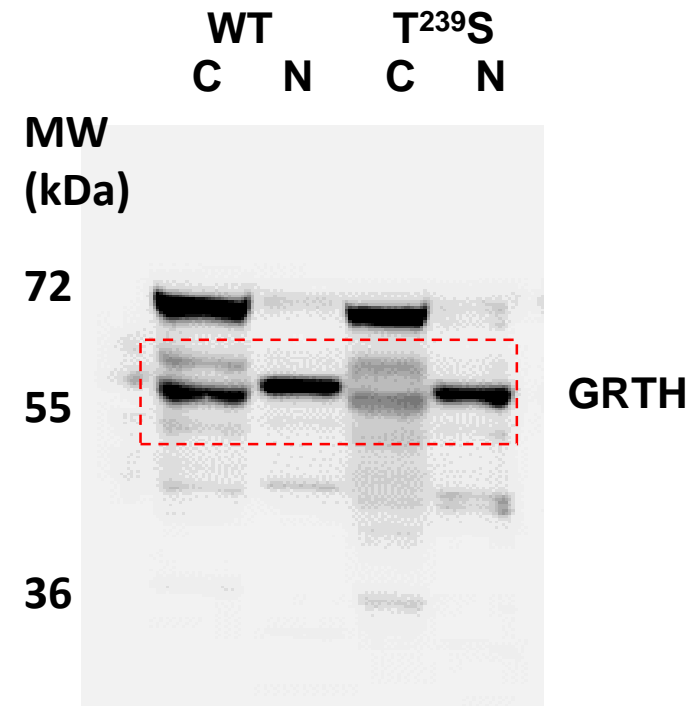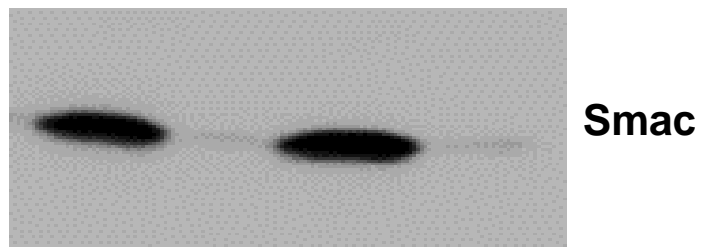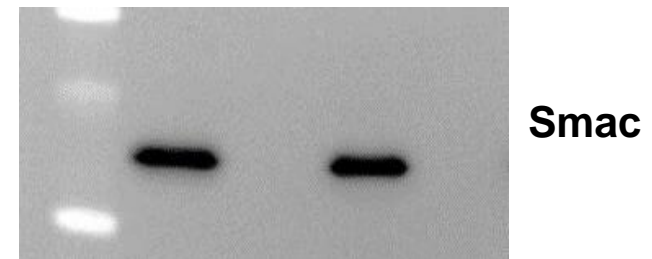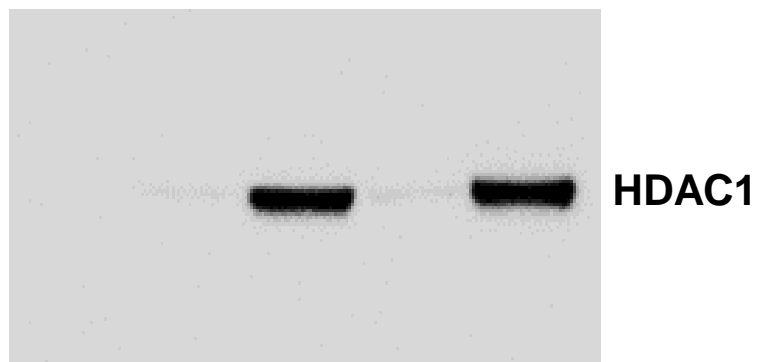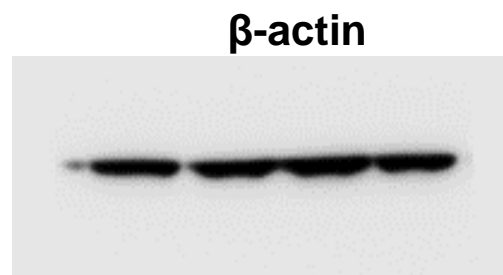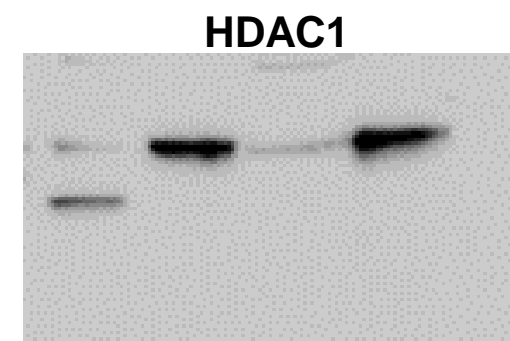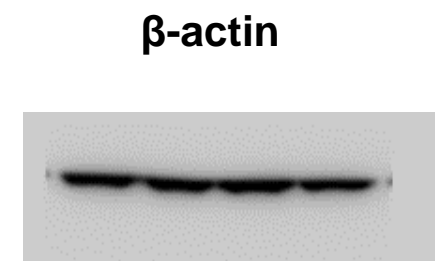

Fig. S4

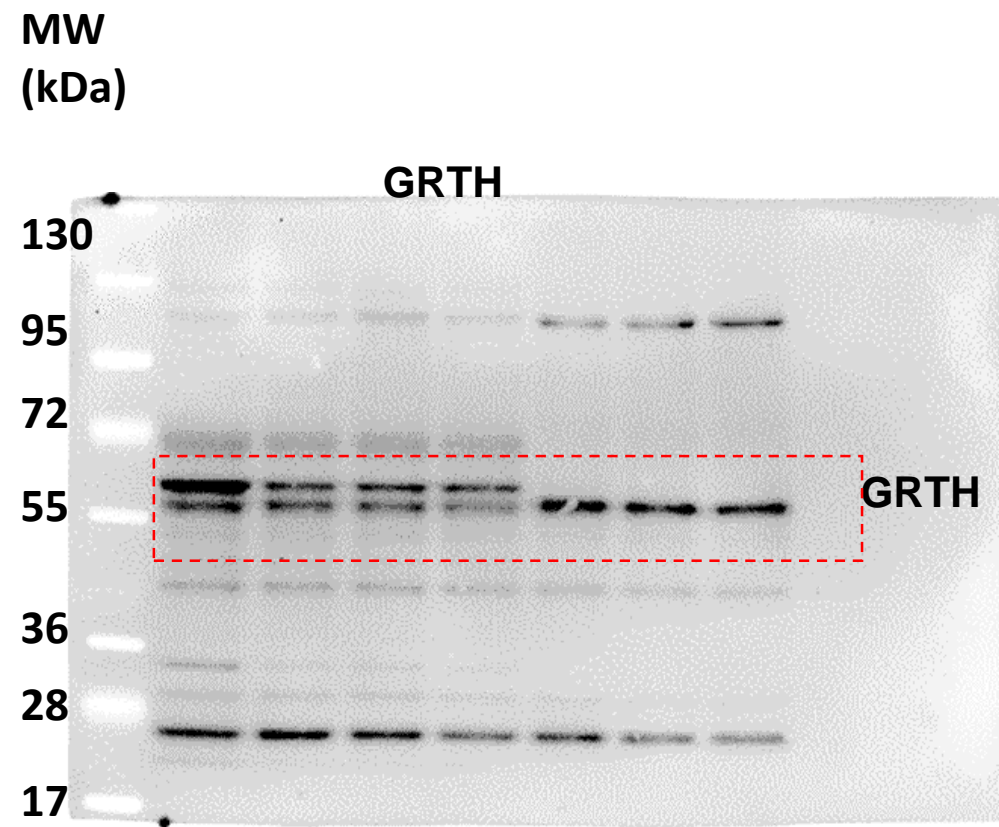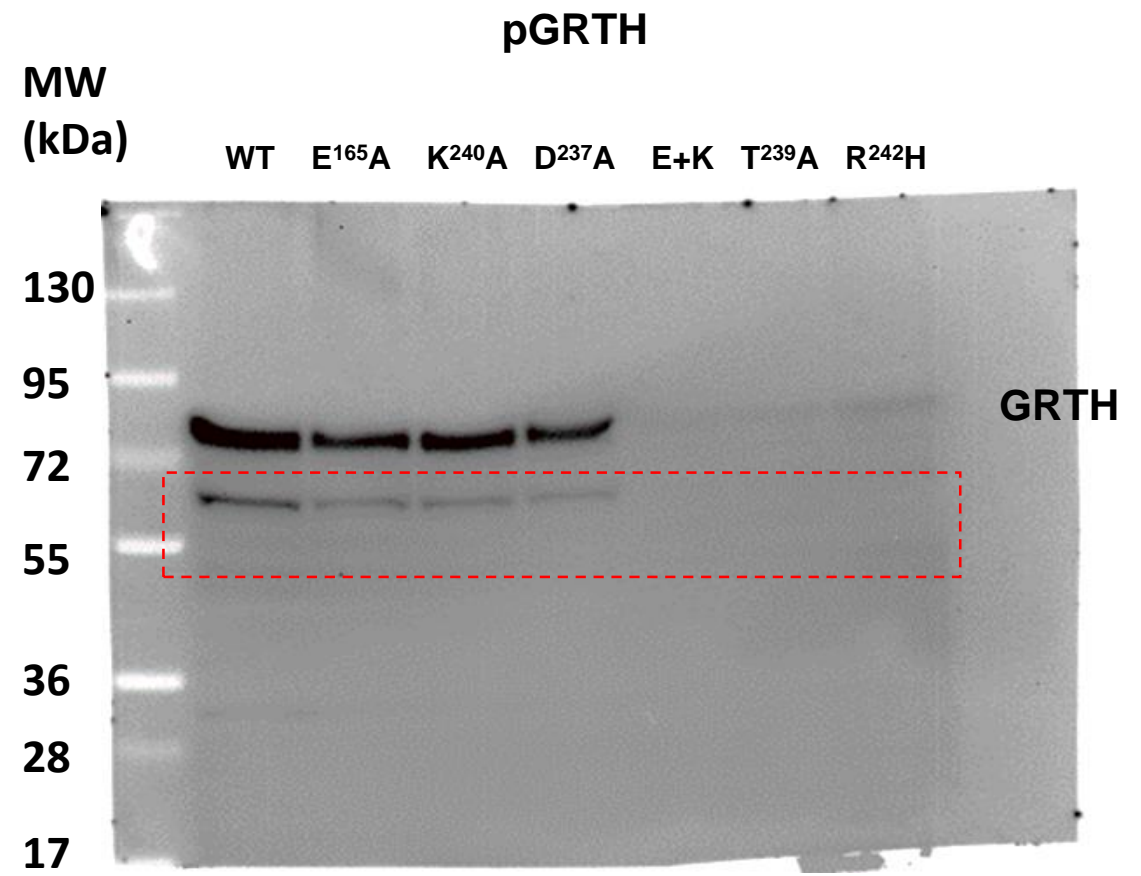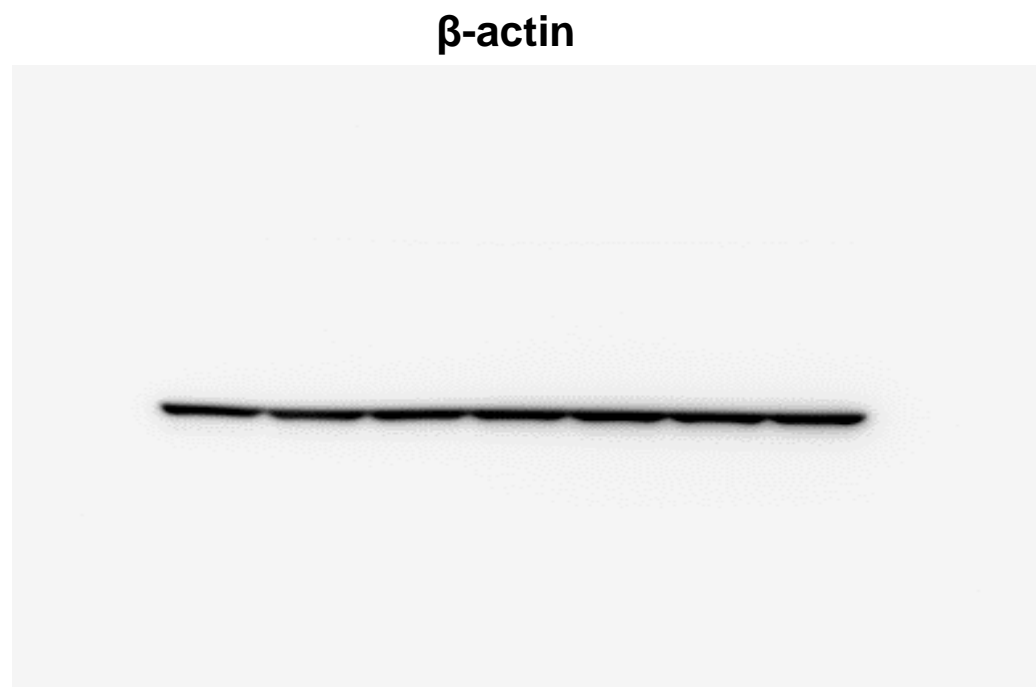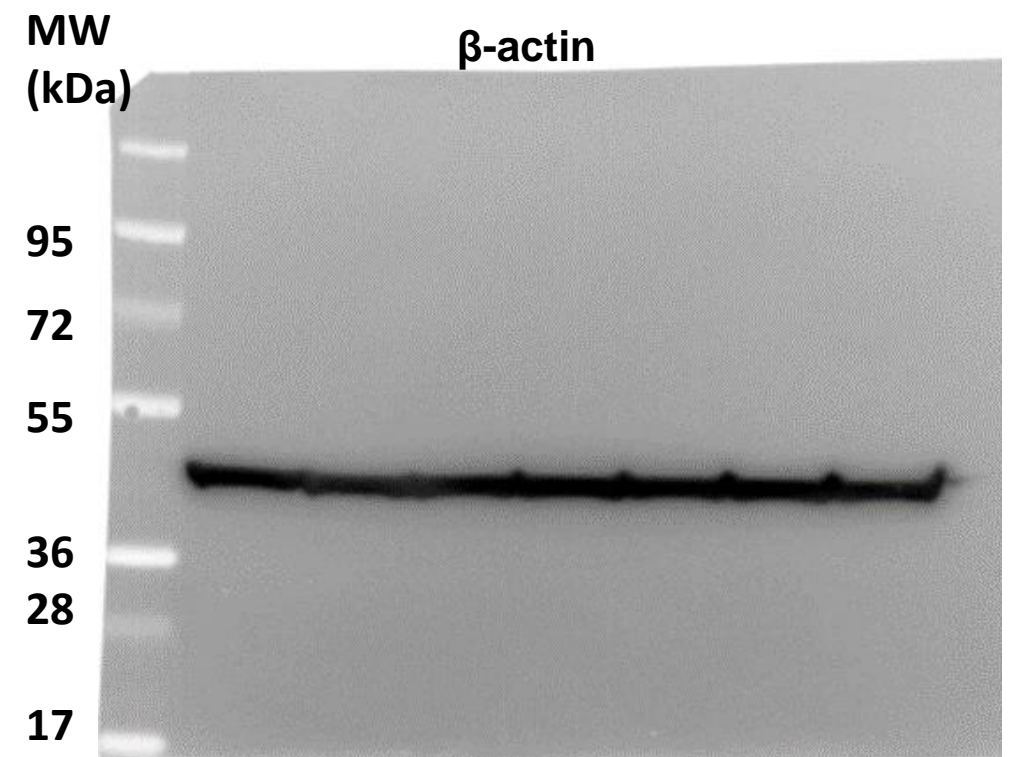

Fig. S5

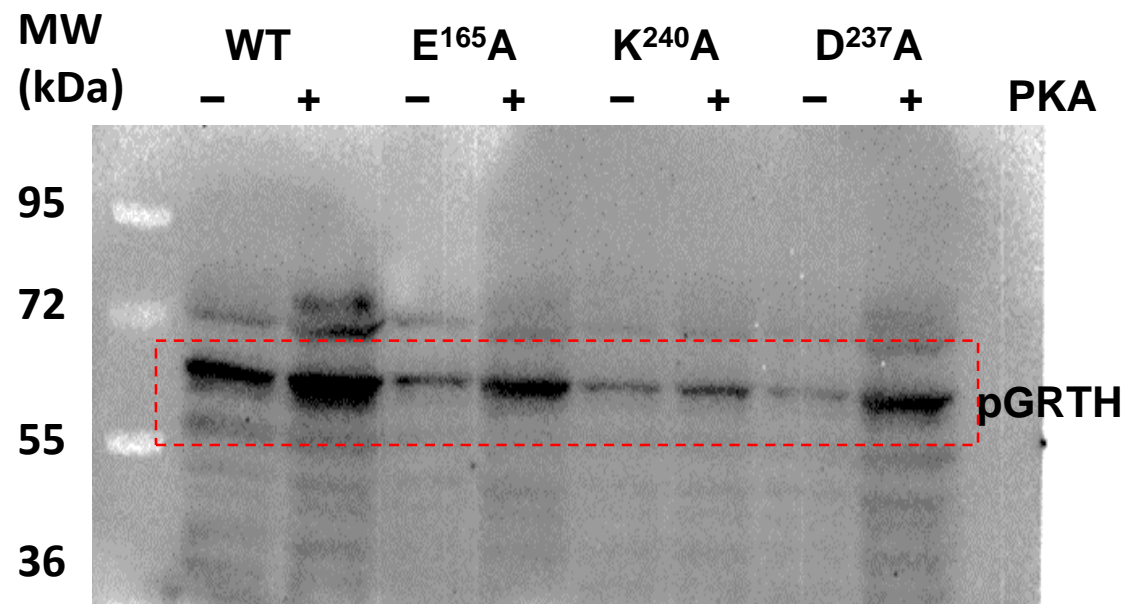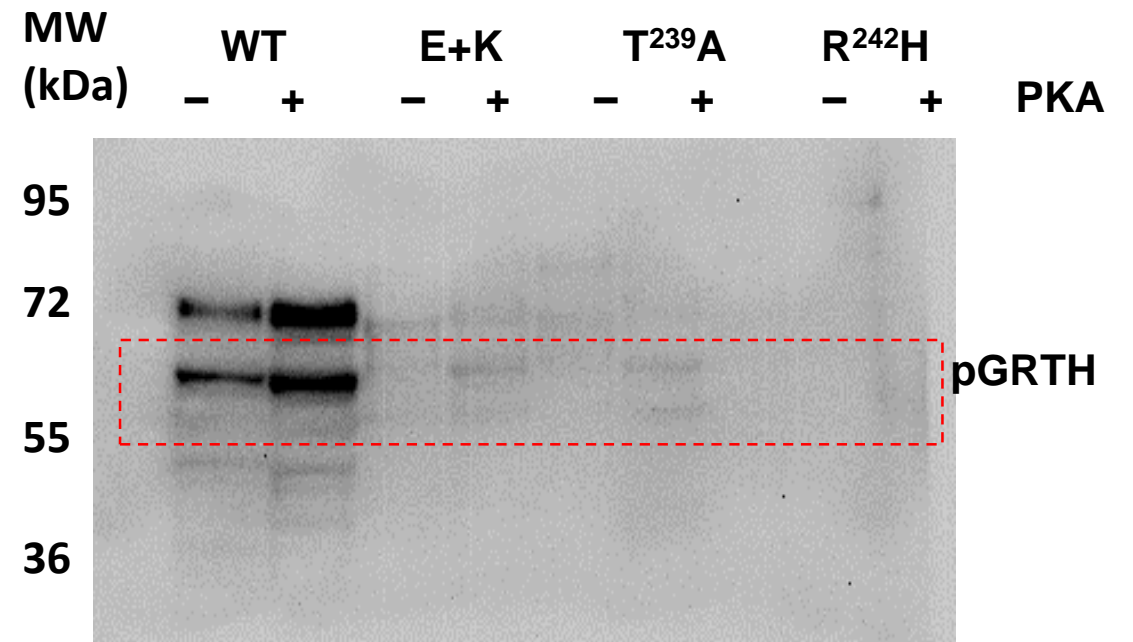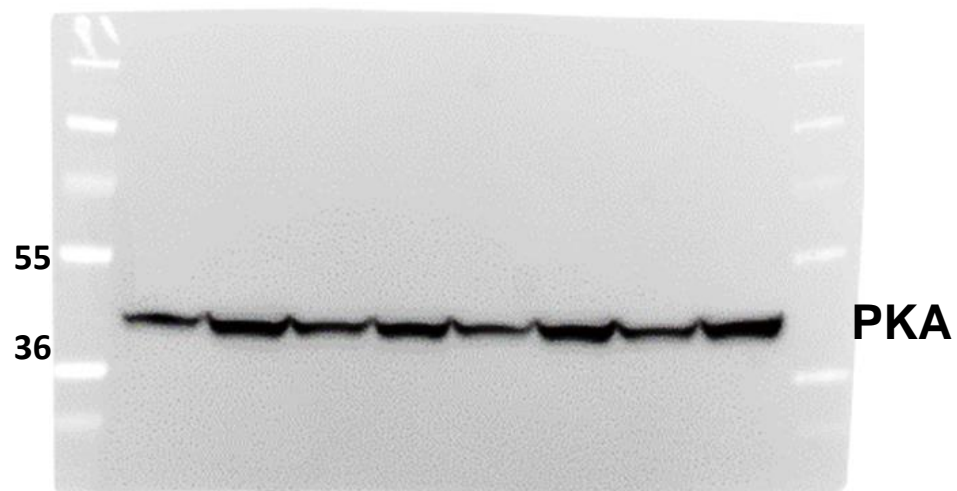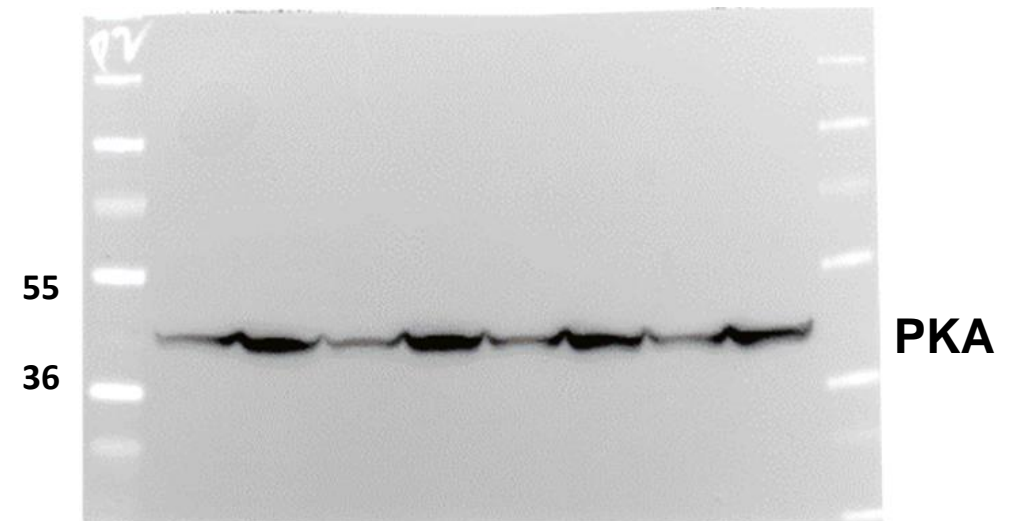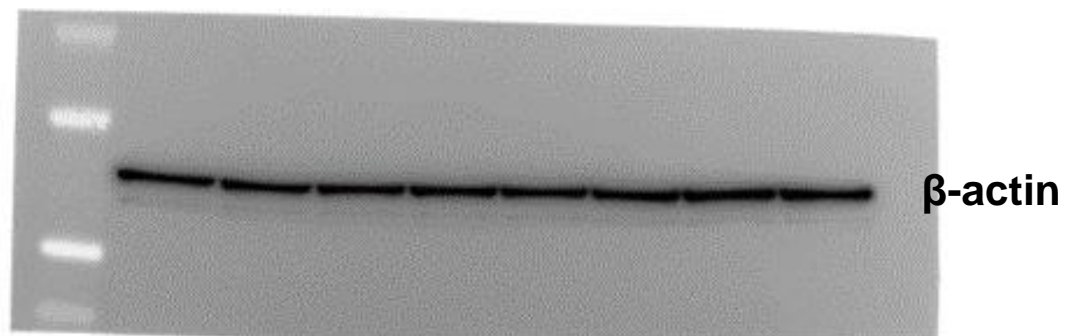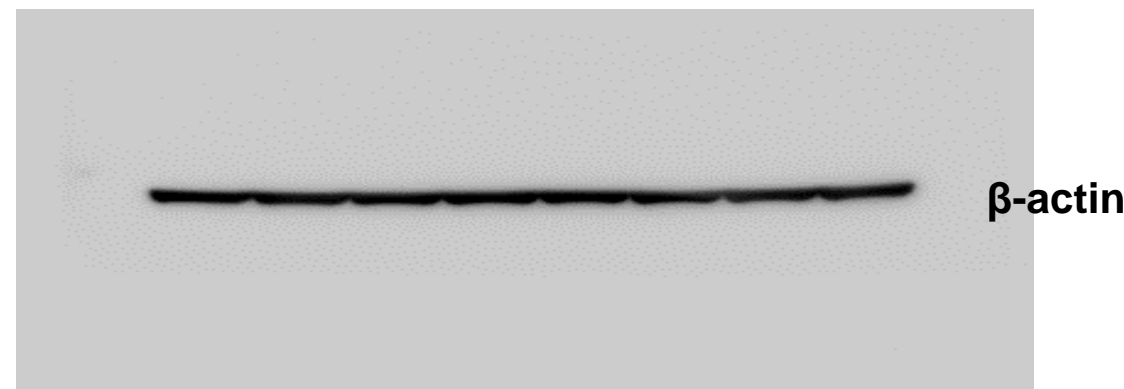

Fig. S6

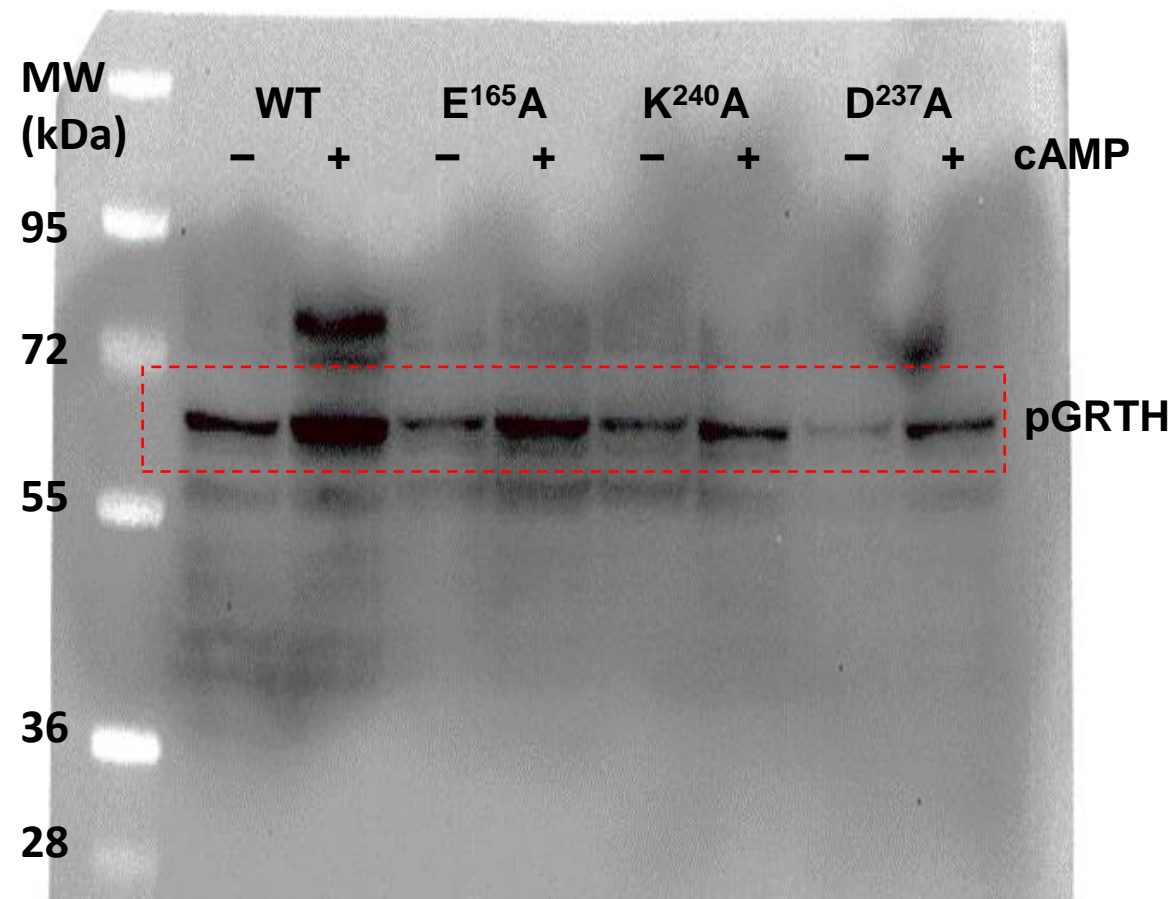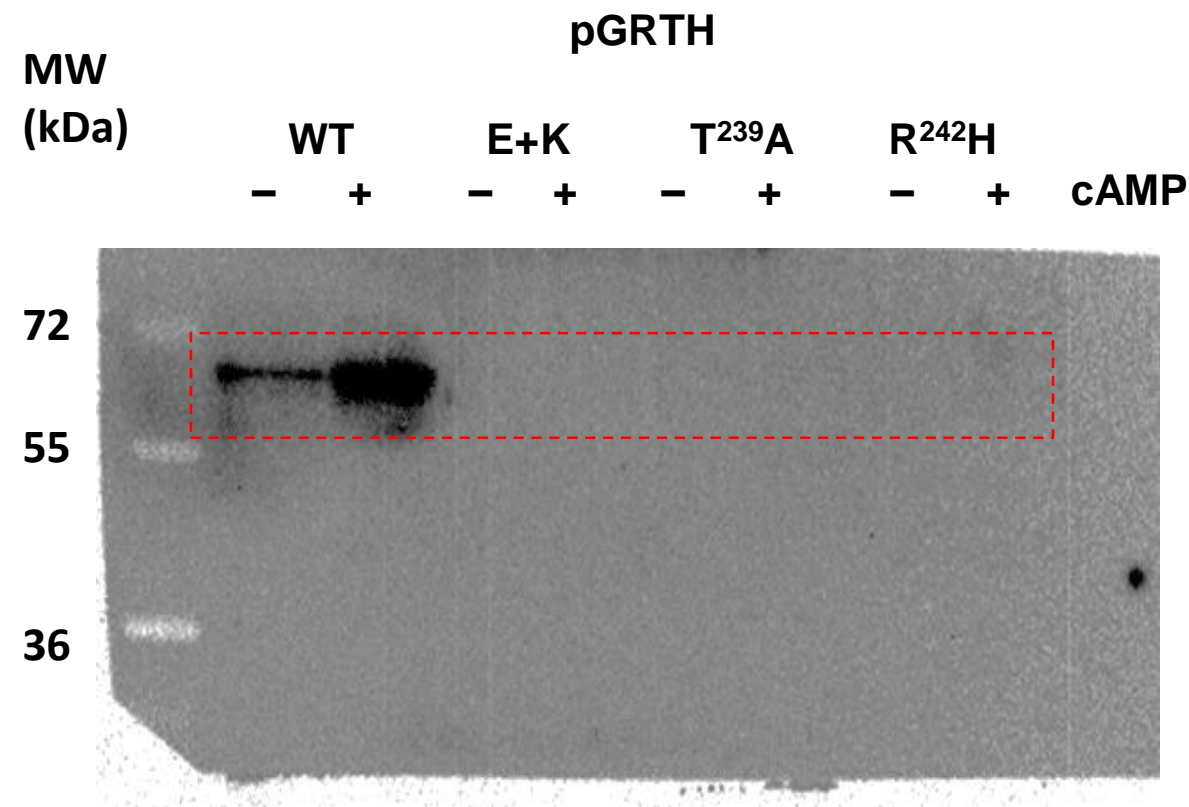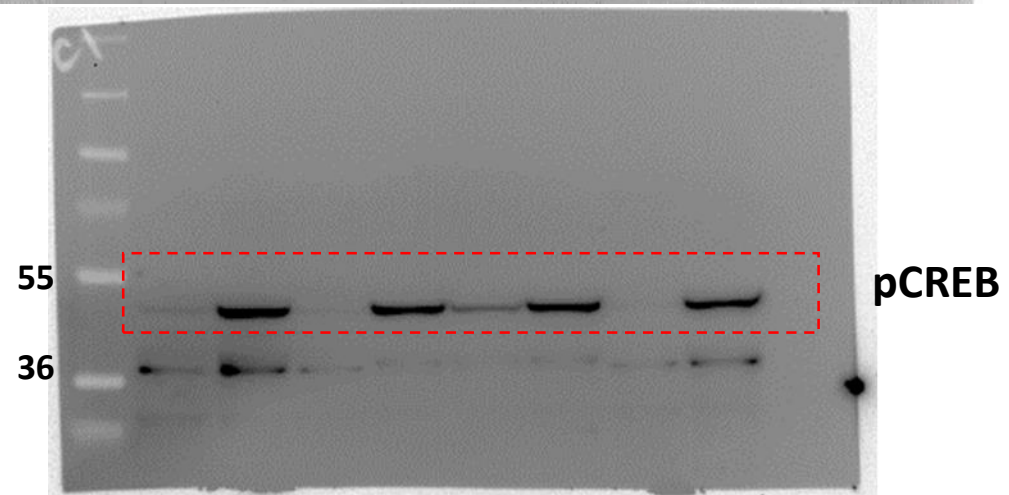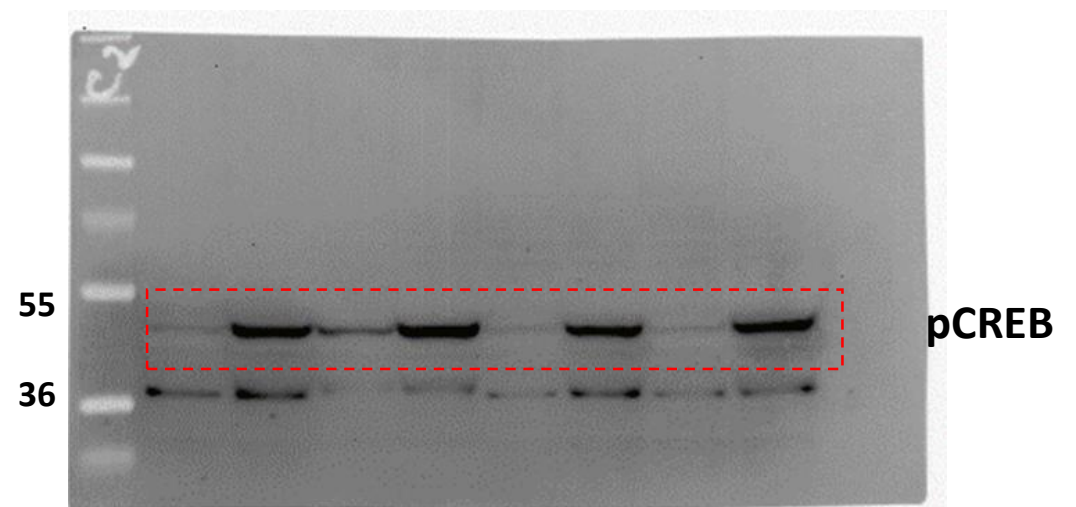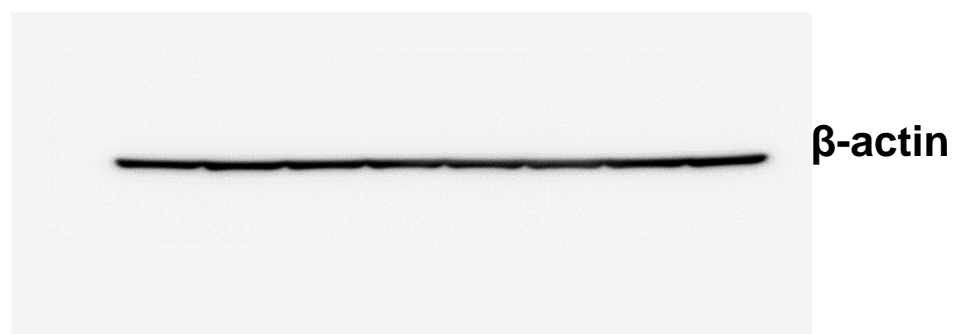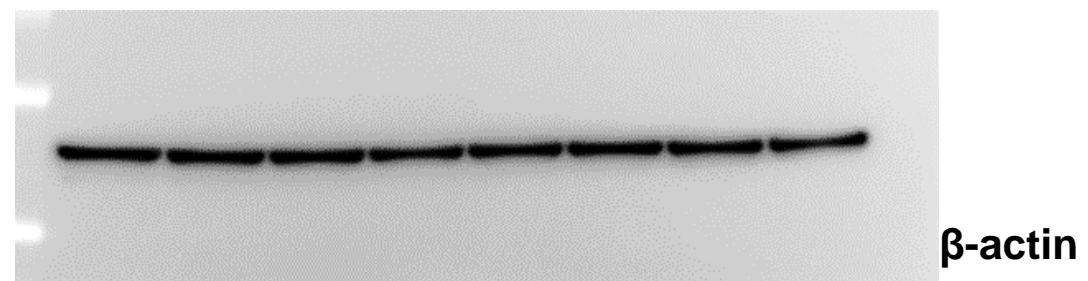

Fig. s7

GRTH interaction with endogenous PKA

GRTH interaction with exogenous PKA

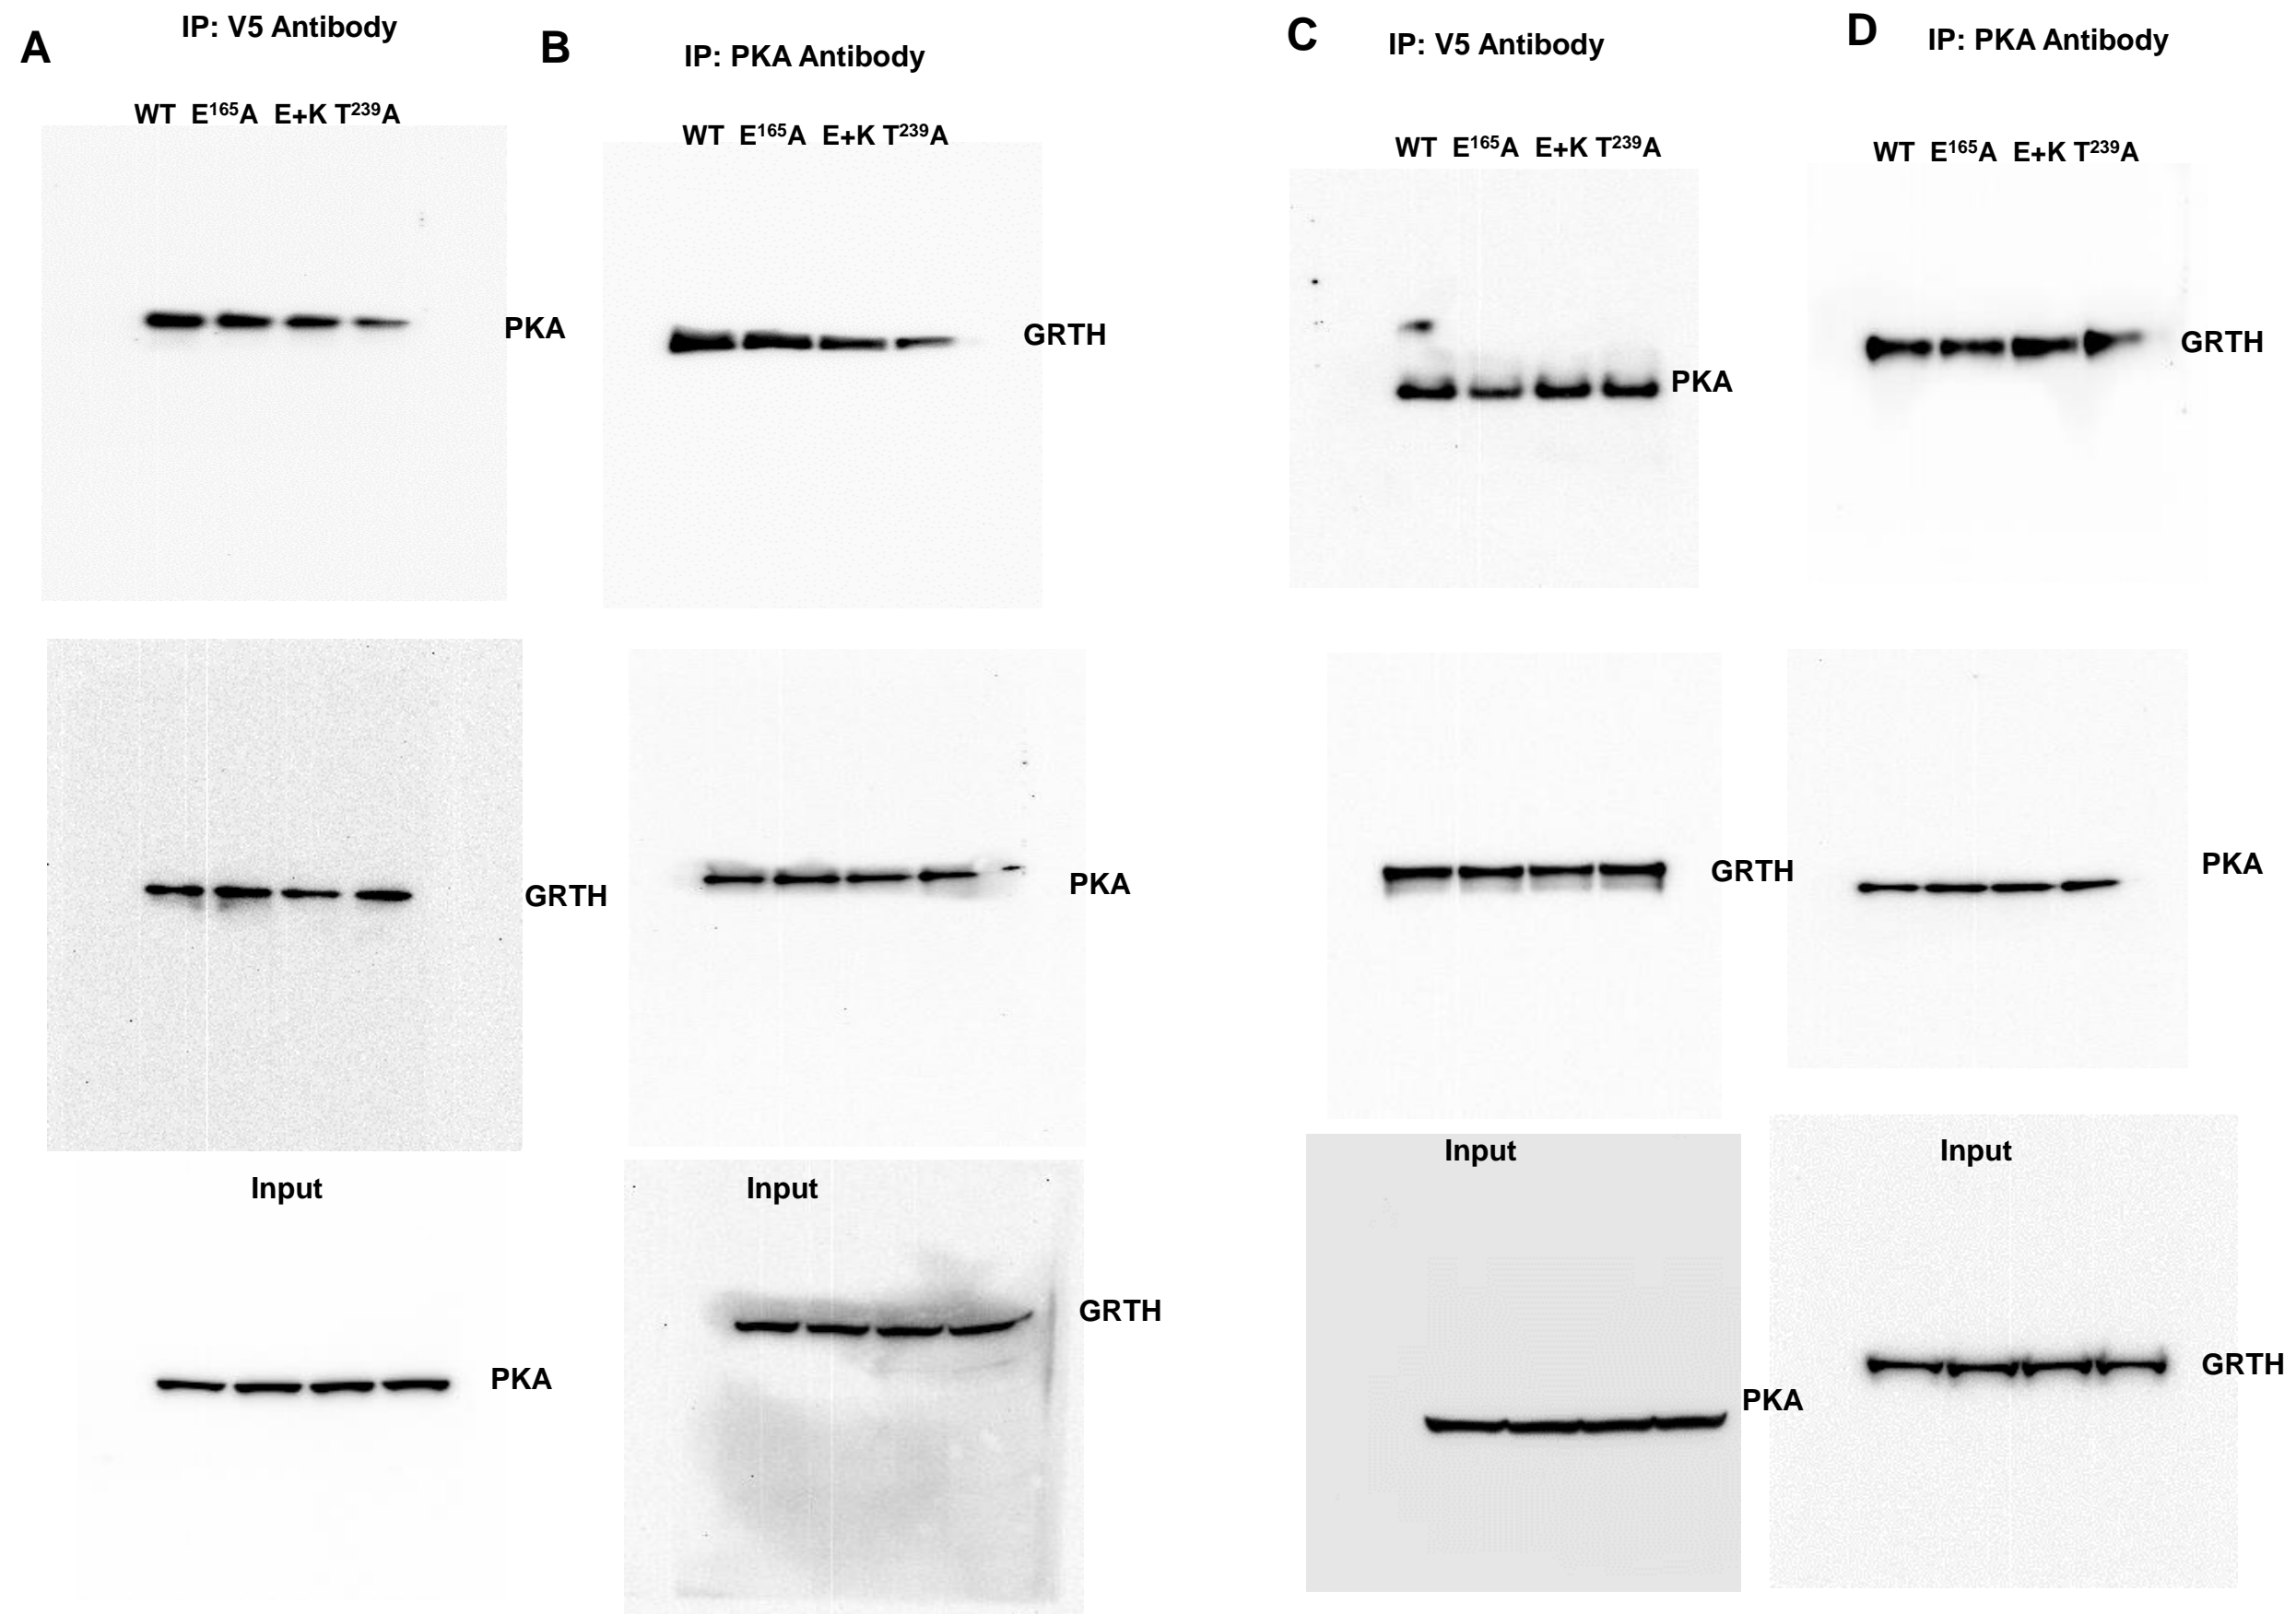

Supplement: 41598_2019_42857_MOESM1_ESM.pdf [file 41598_2019_42857_MOESM1_ESM.pdf]
